# Supplementary material
Source: publisher site journal article supplement (https://www.dovepress.com/article/234335)
Supplement: Supplementary file 1 [file get_supplementary_file.php]

**Supplementary Figure 1.** Predicted probability of reporting “excellent or very good” self-reported general health (SRGH) status for the White males aged 30-39 years with some college or associate degree in 1999-2014, in relation to family poverty income ratio and survey period.

**Supplementary Figure 2.** Predicted probability of reporting “excellent or very good” self-reported oral health (SROH) status for the White males aged 30-39 years with family PIR ≥ 400% and reporting “good, fair or poor” self-reported general health (SRGH) in 1999-2014 from SROH Model 2 (the corresponding reference categories listed in Table 2), in relation to education level and survey period.

**Supplementary Figure 3.** Predicted probability of reporting “excellent or very good” self-reported oral health (SROH) status for the White males with some college or associate degree, family PIR ≥ 400% and reporting “good, fair or poor” self-reported general health (SRGH) in 1999-2014 from SROH Model 2 (the corresponding reference categories listed in Table 2), in relation to age and survey period.
